# Supplementary material for: Nutritional Intake and Meal Composition of Patients Consuming Texture Modified Diets and Thickened Fluids: A Systematic Review and Meta-Analysis
Source: MDPI journal article supplement (doi:10.3390/healthcare8040579), 2020-12-21
Supplement: s1 [file s1]

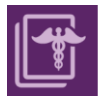

Table S1. Search strategy.

|                           |                                                                                                                                                                                                                                               |
|---------------------------|-----------------------------------------------------------------------------------------------------------------------------------------------------------------------------------------------------------------------------------------------|
| COCHARANE via<br>Central  | 1. (texture* adj1 modif* adj (food or foods or diet or diets or meal or meals)).ti,ab,kw.                                                                                                                                                     |
|                           | 2. ((puree or pureed or mince* or blend* or chop* or soft or soften* or thicken* or liquid* or liquef*) adj1 (food or foods or diet or diets or meal or meals or fluid or fluids)).mp.                                                        |
|                           | 3. 1 or 2                                                                                                                                                                                                                                     |
| MEDLINE (Ovid)            | 1. (texture* adj1 modif* adj (food or foods or diet or diets or meal or meals)).ti,ab,kw.                                                                                                                                                     |
|                           | 2. ((puree or pureed or mince* or blend* or chop* or soft or soften* or thicken* or liquid* or liquef*) adj1 (food or foods or diet or diets or meal or meals or fluid or fluids)).mp.                                                        |
|                           | 3. 1 or 2                                                                                                                                                                                                                                     |
|                           | 4. limit 3 to "humans only (removes records about animals)"                                                                                                                                                                                   |
|                           | 5. limit 4 to ("young adult (19 to 24 years)" or "adult (19 to 44 years)" or "young adult and adult (19-24 and 19-44)" or "middle age (45 to 64 years)" or "middle aged (45 plus years)" or "all aged (65 and over)" or "aged (80 and over)") |
| EMBASE (Ovid)             | 1. (texture* adj1 modif* adj (food or foods or diet or diets or meal or meals)).ti,ab,kw.                                                                                                                                                     |
|                           | 2. ((puree or pureed or mince* or blend* or chop* or soft or soften* or thicken* or liquid* or liquef*) adj1 (food or foods or diet or diets or meal or meals or fluid or fluids)).mp.                                                        |
|                           | 3. 1 or 2                                                                                                                                                                                                                                     |
|                           | 4. limit 3 to "humans only (removes records about animals)"                                                                                                                                                                                   |
|                           | 5. limit 4 to (adult <18 to 64 years> or aged <65+ years>)                                                                                                                                                                                    |
| SCOUPUS                   | 1. TITLE-ABS-KEY ((texture* W/1 modif* ) W/1 ( food* or diet* or meal* ) )                                                                                                                                                                    |
|                           | 2. TITLE-ABS-KEY ((puree* or mince* or blend* or chop* or soft or soften* OR thicken* or liquid* or liquef*) W/1 (food* or diet* or meal* or fluid*))                                                                                         |
|                           | 3. 1 and 2                                                                                                                                                                                                                                    |
| CINAL PLUS<br>(EBSCOhost) | 1. texture* N1 modif* N1 (food* or diet* or meal*                                                                                                                                                                                             |
|                           | 2. ((puree* or mince* or blend* or chop* or soft or soften* or thicken* or liquid* or liquef*) N1 (food* or diet* or meal* or fluid* ))                                                                                                       |
|                           | 3. 1 or 2                                                                                                                                                                                                                                     |
| Search Results            | Search date: 5 <sup>th</sup> May, 2019                                                                                                                                                                                                        |
|                           | 1. CENTRAL—(Cochrane Central Register of Controlled Trials), 1450 results                                                                                                                                                                     |
|                           | 2. MEDLINE (Ovid), 2313 results.                                                                                                                                                                                                              |
|                           | 3. EMBASE (Ovid), 2887 results                                                                                                                                                                                                                |
|                           | 4. SCOPUS, 51 results, 2 more result was found at 25 <sup>th</sup> June, 2019                                                                                                                                                                 |
|                           | 5. CINAL Plus (EBSCOhost), 464 results                                                                                                                                                                                                        |

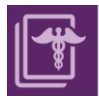

Table S2. Eligible study categorisation by study designs.

|                                                                                                                                                                                                                                                                                                                                                                                                                                                                                                                                                                                                                                                                                                                                                                                                                                                                                                                                                                                                                                                                                                                                                                                                                                                                                                                                                                                                                                                                                                                                                                                                                                                                                                                                                                                                                                                                                                                                                                                                                                                                                                                                                                                                                                                                                                                                                                                                                                                                                                                                                                                                                                                                                                                                                                                                                                                                                                                                                                                                                                                                                                                                                                                                                                                                                                                                                                                                                                                                                                                                                                                                                                                                                                                                                                                                                                                                                                                                                                                                                                                                                                                                                                                                                                                                                                                                                                                                                                                                                                                                                                                                                                                                                                                                                                                                                                                                                                                                                                                                                                                                                                                                                                                                                                                                                                                                                                                                                                                                                                                                                                                                                                                                                                                                                                                                                                                                                                                                                                                                                                                                                                                                                                                                                                                                                                                                                                                                                                                                                                                                                                                                                                                                                                                                                                                                                                                                                                                                                                                                                                                                                                                                                                                                                                                                                                                                                                                                                                                                                                                                                                                                                                                                                                                                                                                                                                                                                                                                                                                                                                                                                                                                                                                                                                                                                                                                                                                                                                                                                                                                                                                                                                                                                                                                                                                                                                                                                                                                                                                                                                                                                                                                                                                                                                                                                                                                                                                                                                                                                                                                                                                                                                                                                                                                                                                                                                                                                                                                                                                                                                                                                                                                                                                                                                                                                                                                                                                                                                                                                                                                                                                                                                                                                                                                                                                                                                                                                                                                                                                                                                                                                                                                                                                                                                                                                                                                                                                                                                                                                                                                                                                                                                                                                                                                                                                                                                                                                                                                                                                                                                                                                                                                                                                                                                                                                                                                                                                                                                                                                                                                                                           |
|---------------------------------------------------------------------------------------------------------------------------------------------------------------------------------------------------------------------------------------------------------------------------------------------------------------------------------------------------------------------------------------------------------------------------------------------------------------------------------------------------------------------------------------------------------------------------------------------------------------------------------------------------------------------------------------------------------------------------------------------------------------------------------------------------------------------------------------------------------------------------------------------------------------------------------------------------------------------------------------------------------------------------------------------------------------------------------------------------------------------------------------------------------------------------------------------------------------------------------------------------------------------------------------------------------------------------------------------------------------------------------------------------------------------------------------------------------------------------------------------------------------------------------------------------------------------------------------------------------------------------------------------------------------------------------------------------------------------------------------------------------------------------------------------------------------------------------------------------------------------------------------------------------------------------------------------------------------------------------------------------------------------------------------------------------------------------------------------------------------------------------------------------------------------------------------------------------------------------------------------------------------------------------------------------------------------------------------------------------------------------------------------------------------------------------------------------------------------------------------------------------------------------------------------------------------------------------------------------------------------------------------------------------------------------------------------------------------------------------------------------------------------------------------------------------------------------------------------------------------------------------------------------------------------------------------------------------------------------------------------------------------------------------------------------------------------------------------------------------------------------------------------------------------------------------------------------------------------------------------------------------------------------------------------------------------------------------------------------------------------------------------------------------------------------------------------------------------------------------------------------------------------------------------------------------------------------------------------------------------------------------------------------------------------------------------------------------------------------------------------------------------------------------------------------------------------------------------------------------------------------------------------------------------------------------------------------------------------------------------------------------------------------------------------------------------------------------------------------------------------------------------------------------------------------------------------------------------------------------------------------------------------------------------------------------------------------------------------------------------------------------------------------------------------------------------------------------------------------------------------------------------------------------------------------------------------------------------------------------------------------------------------------------------------------------------------------------------------------------------------------------------------------------------------------------------------------------------------------------------------------------------------------------------------------------------------------------------------------------------------------------------------------------------------------------------------------------------------------------------------------------------------------------------------------------------------------------------------------------------------------------------------------------------------------------------------------------------------------------------------------------------------------------------------------------------------------------------------------------------------------------------------------------------------------------------------------------------------------------------------------------------------------------------------------------------------------------------------------------------------------------------------------------------------------------------------------------------------------------------------------------------------------------------------------------------------------------------------------------------------------------------------------------------------------------------------------------------------------------------------------------------------------------------------------------------------------------------------------------------------------------------------------------------------------------------------------------------------------------------------------------------------------------------------------------------------------------------------------------------------------------------------------------------------------------------------------------------------------------------------------------------------------------------------------------------------------------------------------------------------------------------------------------------------------------------------------------------------------------------------------------------------------------------------------------------------------------------------------------------------------------------------------------------------------------------------------------------------------------------------------------------------------------------------------------------------------------------------------------------------------------------------------------------------------------------------------------------------------------------------------------------------------------------------------------------------------------------------------------------------------------------------------------------------------------------------------------------------------------------------------------------------------------------------------------------------------------------------------------------------------------------------------------------------------------------------------------------------------------------------------------------------------------------------------------------------------------------------------------------------------------------------------------------------------------------------------------------------------------------------------------------------------------------------------------------------------------------------------------------------------------------------------------------------------------------------------------------------------------------------------------------------------------------------------------------------------------------------------------------------------------------------------------------------------------------------------------------------------------------------------------------------------------------------------------------------------------------------------------------------------------------------------------------------------------------------------------------------------------------------------------------------------------------------------------------------------------------------------------------------------------------------------------------------------------------------------------------------------------------------------------------------------------------------------------------------------------------------------------------------------------------------------------------------------------------------------------------------------------------------------------------------------------------------------------------------------------------------------------------------------------------------------------------------------------------------------------------------------------------------------------------------------------------------------------------------------------------------------------------------------------------------------------------------------------------------------------------------------------------------------------------------------------------------------------------------------------------------------------------------------------------------------------------------------------------------------------------------------------------------------------------------------------------------------------------------------------------------------------------------------------------------------------------------------------------------------------------------------------------------------------------------------------------------------------------------------------------------------------------------------------------------------------------------------------------------------------------------------------------------------------------------------------------------------------------------------------------------------------------------------------------------------------------------------------------------------------------------------------------------------------------------------------------------------------------------------------------------------------------------------------------------------------------------------------------------------------------------------------------------------------------------------------------------------------------------------------------------------------------------------------------------------------------------------------------------------------------------------------------------------------------------------------------------------------------------------------------------------------------------------------------------------------------------------------------------------------------------------------------------------------------------------------------------------------------------------------------------------------------------------------------------------------------------------------------------------------------------------------------------------------------------------------------------------------------------------------------------------------------------------------------------------------------------------------------------------------------------------------------------------------------------------------------------------------------------------------------------------------------------------------------------------------------------------------------------------------------------------------------------------------------------------------------------------------------------------------------------------------------------------------------------------------------------------------------------------|
| Observational<br><br><br><br><br><br><br><br><br><br><br><br><br><br><br><br><br><br><br><br><br><br><br><br><br><br><br><br><br><br><br><br><br><br><br><br><br><br><br><br><br><br><br><br><br><br><br><br><br><br><br><br><br><br><br><br><br><br><br><br><br><br><br><br><br><br><br><br><br><br><br><br><br><br><br><br><br><br><br><br><br><br><br><br><br><br><br><br><br><br><br><br><br><br><br><br><br><br><br><br><br><br><br><br><br><br><br><br><br><br><br><br><br><br><br><br><br><br><br><br><br><br><br><br><br><br><br><br><br><br><br><br><br><br><br><br><br><br><br><br><br><br><br><br><br><br><br><br><br><br><br><br><br><br><br><br><br><br><br><br><br><br><br><br><br><br><br><br><br><br><br><br><br><br><br><br><br><br><br><br><br><br><br><br><br><br><br><br><br><br><br><br><br><br><br><br><br><br><br><br><br><br><br><br><br><br><br><br><br><br><br><br><br><br><br><br><br><br><br><br><br><br><br><br><br><br><br><br><br><br><br><br><br><br><br><br><br><br><br><br><br><br><br><br><br><br><br><br><br><br><br><br><br><br><br><br><br><br><br><br><br><br><br><br><br><br><br><br><br><br><br><br><br><br><br><br><br><br><br><br><br><br><br><br><br><br><br><br><br><br><br><br><br><br><br><br><br><br><br><br><br><br><br><br><br><br><br><br><br><br><br><br><br><br><br><br><br><br><br><br><br><br><br><br><br><br><br><br><br><br><br><br><br><br><br><br><br><br><br><br><br><br><br><br><br><br><br><br><br><br><br><br><br><br><br><br><br><br><br><br><br><br><br><br><br><br><br><br><br><br><br><br><br><br><br><br><br><br><br><br><br><br><br><br><br><br><br><br><br><br><br><br><br><br><br><br><br><br><br><br><br><br><br><br><br><br><br><br><br><br><br><br><br><br><br><br><br><br><br><br><br><br><br><br><br><br><br><br><br><br><br><br><br><br><br><br><br><br><br><br><br><br><br><br><br><br><br><br><br><br><br><br><br><br><br><br><br><br><br><br><br><br><br><br><br><br><br><br><br><br><br><br><br><br><br><br><br><br><br><br><br><br><br><br><br><br><br><br><br><br><br><br><br><br><br><br><br><br><br><br><br><br><br><br><br><br><br><br><br><br><br><br><br><br><br><br><br><br><br><br><br><br><br><br><br><br><br><br><br><br><br><br><br><br><br><br><br><br><br><br><br><br><br><br><br><br><br><br><br><br><br><br><br><br><br><br><br><br><br><br><br><br><br><br><br><br><br><br><br><br><br><br><br><br><br><br><br><br><br><br><br><br><br><br><br><br><br><br><br><br><br><br><br><br><br><br><br><br><br><br><br><br><br><br><br><br><br><br><br><br><br><br><br><br><br><br><br><br><br><br><br><br><br><br><br><br><br><br><br><br><br><br><br><br><br><br><br><br><br><br><br><br><br><br><br><br><br><br><br><br><br><br><br><br><br><br><br><br><br><br><br><br><br><br><br><br><br><br><br><br><br><br><br><br><br><br><br><br><br><br><br><br><br><br><br><br><br><br><br><br><br><br><br><br><br><br><br><br><br><br><br><br><br><br><br><br><br><br><br><br><br><br><br><br><br><br><br><br><br><br><br><br><br><br><br><br><br><br><br><br><br><br><br><br><br><br><br><br><br><br><br><br><br><br><br><br><br><br><br><br><br><br><br><br><br><br><br><br><br><br><br><br><br><br><br><br><br><br><br><br><br><br><br><br><br><br><br><br><br><br><br><br><br><br><br><br><br><br><br><br><br><br><br><br><br><br><br><br><br><br><br><br><br><br><br><br><br><br><br><br><br><br><br><br><br><br><br><br><br><br><br><br><br><br><br><br><br><br><br><br><br><br><br><br><br><br><br><br><br><br><br><br><br><br><br><br><br><br><br><br><br><br><br><br><br><br><br><br><br><br><br><br><br><br><br><br><br><br><br><br><br><br><br><br><br><br><br><br><br><br><br><br><br><br><br><br><br><br><br><br><br><br><br><br><br><br><br><br><br><br><br><br><br><br><br><br><br><br><br><br><br><br><br><br><br><br><br><br><br><br><br><br><br><br><br><br><br><br><br><br><br><br><br><br><br><br><br><br><br><br><br><br><br><br><br><br><br><br><br><br><br><br><br><br><br><br><br><br><br><br><br><br><br><br><br><br><br><br><br><br><br><br><br><br><br><br><br><br><br><br><br><br><br><br><br><br><br><br><br><br><br><br><br><br><br><br><br><br><br><br><br><br><br><br><br><br><br><br><br><br><br><br><br><br><br><br><br><br><br><br><br><br><br><br><br><br><br><br><br><br><br><br><br><br><br><br><br><br><br><br><br><br><br><br><br><br><br><br><br><br><br><br><br><br><br><br><br><br><br><br><br><br><br><br><br><br><br><br><br><br><br><br><br><br><br><br><br><br><br><br><br><br><br><br><br><br><br><br><br><br><br><br><br><br><br><br><br><br><br><br><br><br><br><br><br><br><br><br><br><br><br><br><br><br><br><br><br><br><br><br><br><br><br><br><br><br><br><br><br><br><br><br><br><br><br><br><br><br><br><br><br><br><br><br><br><br><br><br><br><br><br><br><br><br><br><br><br><br><br><br><br><br><br><br><br><br><br><br><br><br><br><br><br><br><br><br><br><br><br><br><br><br><br><br><br><br><br><br><br><br><br><br><br><br><br><br><br><br><br><br><br><br><br><br><br><br><br><br><br><br><br><br><br><br><br><br><br><br><br><br><br><br><br><br><br><br><br><br><br><br><br><br><br><br><br><br><br><br><br><br><br><br><br><br><br><br><br><br><br><br><br><br><br><br><br><br><br><br><br><br><br><br><br><br><br><br><br><br><br><br><br><br><br><br><br><br><br><br><br><br><br><br><br><br><br><br><br><br><br><br><br><br><br><br><br><br><br><br><br><br><br><br><br><br><br><br><br><br><br><br><br><br><br><br><br><br><br><br><br><br><br><br><br><br><br><br><br><br><br><br><br><br><br><br><br><br><br><br><br><br><br><br><br><br><br><br><br><br><br><br><br><br><br><br><br><br><br><br><br><br><br><br><br><br><br><br><br><br><br><br><br><br><br><br><br><br><br><br><br><br><br><br><br><br><br><br><br><br><br><br><br><br><br><br><br><br><br><br><br><br><br><br><br><br><br><br><br><br><br><br><br><br><br><br><br><br><br><br><br><br><br><br><br><br><br><br><br><br><br><br><br><br><br><br><br><br><br><br><br><br><br><br><br><br><br><br><br><br><br><br><br><br><br><br><br><br><br><br><br><br><br><br><br><br><br><br><br><br><br><br><br><br><br><br><br><br><br><br><br><br><br><br><br><br><br><br><br><br><br><br><br><br><br><br><br><br><br><br><br><br><br><br><br><br><br><br><br><br><br><br><br><br><br><br><br><br><br><br><br><br><br><br><br><br><br><br><br><br><br><br><br><br><br><br><br><br><br><br><br><br><br><br><br><br><br><br><br><br><br><br><br><br><br><br><br><br><br><br><br><br><br><br><br><br><br><br><br><br><br><br><br><br><br><br><br><br><br><br><br><br><br><br><br><br><br><br><br><br><br><br><br><br><br><br><br><br><br><br><br><br><br><br><br><br><br><br><br><br><br><br><br><br><br><br><br><br><br><br><br><br><br><br><br><br><br><br><br><br><br><br><br><br><br><br><br><br><br><br><br><br><br><br><br><br><br><br><br><br><br><br><br><br><br><br><br><br><br><br><br><br><br><br><br><br><br><br><br><br><br><br><br><br><br><br><br><br><br><br><br><br><br><br><br><br><br><br><br><br><br><br><br><br><br><br><br><br><br><br><br><br><br><br><br><br><br><br><br><br><br><br><br><br><br><br><br><br><br><br><br><br><br><br><br><br><br><br><br><br><br><br><br><br><br><br><br><br><br><br><br><br><br><br><br><br><br><br><br><br><br><br><br><br><br><br><br><br><br><br><br><br><br><br><br><br><br><br><br><br><br><br><br><br><br><br><br><br><br><br><br><br><br><br><br><br><br><br><br><br><br><br><br><br><br><br><br><br><br><br><br><br><br><br><br><br><br><br><br><br><br><br><br><br><br><br><br><br><br><br><br><br><br><br><br><br><br><br><br><br><br><br><br><br><br><br><br><br><br><br><br><br><br><br><br><br><br><br><br><br><br><br><br><br><br><br><br><br><br><br><br><br><br><br><br><br><br><br><br><br><br><br><br><br><br><br><br><br><br><br><br><br><br><br><br><br><br><br><br><br><br><br><br><br><br><br><br><br><br><br><br><br><br><br><br><br><br><br><br><br><br><br><br><br><br><br><br><br><br><br><br><br><br><br><br><br><br><br><br><br><br><br><br><br><br><br><br><br><br><br><br><br><br><br><br><br><br><br><br><br><br><br><br><br><br><br><br><br><br><br><br><br><br><br><br><br><br><br><br><br><br><br><br><br><br><br><br><br><br><br><br><br><br><br><br><br><br><br><br><br><br><br><br><br><br><br><br><br><br><br><br><br><br><br><br><br><br><br><br><br><br><br><br><br><br><br><br><br><br><br><br><br><br><br><br><br><br><br><br><br><br><br><br><br><br><br><br><br><br><br><br><br><br><br><br><br><br><br><br><br><br><br><br><br><br><br><br><br><br><br><br><br><br><br><br><br><br><br><br><br><br><br><br><br><br><br><br><br><br><br><br><br><br><br><br><br><br><br><br><br><br><br><br><br><br><br><br><br><br><br><br><br><br><br><br><br><br><br><br><br><br><br><br><br><br><br><br><br><br><br><br><br><br><br><br><br><br><br><br><br><br><br><br><br><br><br><br><br><br><br><br><br><br><br><br><br><br><br><br><br><br><br><br><br><br><br><br><br><br><br><br><br><br><br><br><br><br><br><br><br><br><br><br><br><br><br><br><br><br><br><br><br><br><br><br><br><br><br><br><br><br><br><br><br><br><br><br><br><br><br><br><br><br><br><br><br><br><br><br><br><br><br><br><br><br><br><br><br><br><br><br><br><br><br><br><br><br><br><br><br><br><br><br><br><br><br><br><br><br><br><br><br><br><br><br><br><br><br><br><br><br><br><br><br><br><br><br><br><br><br><br><br><br><br><br><br><br><br><br><br><br><br><br><br><br><br><br><br><br><br><br><br><br><br><br><br><br><br><br><br><br><br><br><br><br><br><br><br><br><br><br><br><br><br><br><br><br><br><br><br><br><br><br><br><br><br><br><br><br><br><br><br><br><br><br><br><br><br><br><br><br><br><br><br><br><br><br><br><br><br><br><br><br><br><br><br><br><br><br><br><br><br><br><br><br><br><br><br><br><br><br><br><br><br><br><br><br><br><br><br><br><br><br><br><br><br><br><br><br><br><br><br><br><br><br><br><br><br><br><br><br><br><br><br><br><br><br><br><br><br><br><br><br><br><br><br><br><br><br><br><br><br><br><br><br><br><br><br><br><br><br><br><br><br><br><br><br><br><br><br><br><br><br><br><br><br><br><br><br><br><br><br><br><br><br><br><br><br><br><br><br><br><br><br><br><br><br><br><br><br><br><br><br><br><br><br><br><br><br><br><br><br><br><br><br><br><br><br><br><br><br><br><br><br><br><br><br><br><br><br><br><br><br><br><br><br><br><br><br><br><br><br><br><br><br><br><br><br><br><br><br><br><br><br><br><br><br><br><br><br><br><br><br><br><br><br><br><br><br><br><br><br><br><br><br><br><br><br><br><br><br><br><br><br><br><br><br><br><br><br><br><br><br><br><br><br><br><br><br><br><br><br><br><br><br><br><br><br><br><br><br><br><br><br><br><br><br><br><br><br><br><br><br><br><br><br><br><br><br><br><br><br><br><br><br><br><br><br><br><br><br><br><br><br><br><br><br><br><br><br><br><br><br><br><br><br><br><br><br><br><br><br><br><br><br><br><br><br><br><br><br><br><br><br><br><br><br><br><br><br><br><br><br><br><br><br><br><br><br><br><br><br><br><br><br><br><br><br><br><br><br><br><br><br><br><br><br><br><br><br><br><br><br><br><br><br><br><br><br><br><br><br><br><br><br><br><br><br><br><br><br><br><br><br><br><br><br><br><br><br><br><br><br><br><br><br><br><br><br><br><br><br><br><br><br><br><br><br><br><br><br><br><br><br><br><br><br><br><br><br><br><br><br><br><br><br><br><br><br><br><br><br><br><br><br><br><br><br><br><br><br><br><br><br><br><br><br><br><br><br><br><br><br><br><br><br><br><br><br><br><br><br><br><br><br><br><br><br><br><br><br><br><br><br><br><br><br><br><br><br><br><br><br><br><br><br><br><br><br><br><br><br><br><br><br><br><br><br><br><br><br><br><br><br><br><br><br><br><br><br><br><br><br><br><br><br><br><br><br><br><br><br><br><br><br><br><br><br><br><br><br><br><br><br><br><br><br><br><br><br><br><br><br><br><br><br><br><br><br><br><br><br><br><br><br><br><br><br><br><br><br><br><br><br><br><br><br><br><br><br><br><br><br><br><br><br><br><br><br><br><br><br><br><br><br><br><br><br><br><br><br><br><br><br><br><br><br><br><br><br><br><br><br><br><br><br><br><br><br><br><br><br><br><br><br><br><br><br><br><br><br><br><br><br><br><br><br><br><br><br><br><br><br><br><br><br><br><br><br><br><br><br><br><br><br><br><br><br><br><br><br><br><br><br><br><br><br><br><br><br><br><br><br><br><br><br><br><br><br><br><br><br><br><br><br><br><br><br><br><br><br><br><br><br><br><br><br><br><br><br><br><br><br><br><br><br><br><br><br><br><br><br><br><br><br><br><br> |
|---------------------------------------------------------------------------------------------------------------------------------------------------------------------------------------------------------------------------------------------------------------------------------------------------------------------------------------------------------------------------------------------------------------------------------------------------------------------------------------------------------------------------------------------------------------------------------------------------------------------------------------------------------------------------------------------------------------------------------------------------------------------------------------------------------------------------------------------------------------------------------------------------------------------------------------------------------------------------------------------------------------------------------------------------------------------------------------------------------------------------------------------------------------------------------------------------------------------------------------------------------------------------------------------------------------------------------------------------------------------------------------------------------------------------------------------------------------------------------------------------------------------------------------------------------------------------------------------------------------------------------------------------------------------------------------------------------------------------------------------------------------------------------------------------------------------------------------------------------------------------------------------------------------------------------------------------------------------------------------------------------------------------------------------------------------------------------------------------------------------------------------------------------------------------------------------------------------------------------------------------------------------------------------------------------------------------------------------------------------------------------------------------------------------------------------------------------------------------------------------------------------------------------------------------------------------------------------------------------------------------------------------------------------------------------------------------------------------------------------------------------------------------------------------------------------------------------------------------------------------------------------------------------------------------------------------------------------------------------------------------------------------------------------------------------------------------------------------------------------------------------------------------------------------------------------------------------------------------------------------------------------------------------------------------------------------------------------------------------------------------------------------------------------------------------------------------------------------------------------------------------------------------------------------------------------------------------------------------------------------------------------------------------------------------------------------------------------------------------------------------------------------------------------------------------------------------------------------------------------------------------------------------------------------------------------------------------------------------------------------------------------------------------------------------------------------------------------------------------------------------------------------------------------------------------------------------------------------------------------------------------------------------------------------------------------------------------------------------------------------------------------------------------------------------------------------------------------------------------------------------------------------------------------------------------------------------------------------------------------------------------------------------------------------------------------------------------------------------------------------------------------------------------------------------------------------------------------------------------------------------------------------------------------------------------------------------------------------------------------------------------------------------------------------------------------------------------------------------------------------------------------------------------------------------------------------------------------------------------------------------------------------------------------------------------------------------------------------------------------------------------------------------------------------------------------------------------------------------------------------------------------------------------------------------------------------------------------------------------------------------------------------------------------------------------------------------------------------------------------------------------------------------------------------------------------------------------------------------------------------------------------------------------------------------------------------------------------------------------------------------------------------------------------------------------------------------------------------------------------------------------------------------------------------------------------------------------------------------------------------------------------------------------------------------------------------------------------------------------------------------------------------------------------------------------------------------------------------------------------------------------------------------------------------------------------------------------------------------------------------------------------------------------------------------------------------------------------------------------------------------------------------------------------------------------------------------------------------------------------------------------------------------------------------------------------------------------------------------------------------------------------------------------------------------------------------------------------------------------------------------------------------------------------------------------------------------------------------------------------------------------------------------------------------------------------------------------------------------------------------------------------------------------------------------------------------------------------------------------------------------------------------------------------------------------------------------------------------------------------------------------------------------------------------------------------------------------------------------------------------------------------------------------------------------------------------------------------------------------------------------------------------------------------------------------------------------------------------------------------------------------------------------------------------------------------------------------------------------------------------------------------------------------------------------------------------------------------------------------------------------------------------------------------------------------------------------------------------------------------------------------------------------------------------------------------------------------------------------------------------------------------------------------------------------------------------------------------------------------------------------------------------------------------------------------------------------------------------------------------------------------------------------------------------------------------------------------------------------------------------------------------------------------------------------------------------------------------------------------------------------------------------------------------------------------------------------------------------------------------------------------------------------------------------------------------------------------------------------------------------------------------------------------------------------------------------------------------------------------------------------------------------------------------------------------------------------------------------------------------------------------------------------------------------------------------------------------------------------------------------------------------------------------------------------------------------------------------------------------------------------------------------------------------------------------------------------------------------------------------------------------------------------------------------------------------------------------------------------------------------------------------------------------------------------------------------------------------------------------------------------------------------------------------------------------------------------------------------------------------------------------------------------------------------------------------------------------------------------------------------------------------------------------------------------------------------------------------------------------------------------------------------------------------------------------------------------------------------------------------------------------------------------------------------------------------------------------------------------------------------------------------------------------------------------------------------------------------------------------------------------------------------------------------------------------------------------------------------------------------------------------------------------------------------------------------------------------------------------------------------------------------------------------------------------------------------------------------------------------------------------------------------------------------------------------------------------------------------------------------------------------------------------------------------------------------------------------------------------------------------------------------------------------------------------------------------------------------------------------------------------------------------------------------------------------------------------------------------------------------------------------------------------------------------------------------------------------------------------------------------------------------------------------------------------------------------------------------------------------------------------------------------------------------------------------------------------------------------------------------------------------------------------------------------------------------------------------------------------------------------------------------------------------------------------------------------------------------------------------------------------------------------------------------------------------------------------------------------------------------------------------------------------------------------------------------------------|

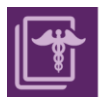

Table S3. Risk of bias of observational studies included in meta-analysis.

| Study                   | Risk of Bias |     |          |     |     |          |     |
|-------------------------|--------------|-----|----------|-----|-----|----------|-----|
|                         | C            | S   | ME       | DE  | MI  | MO       | R   |
| Bannerman and McDermott | Low          | Low | Moderate | Low | Low | Low      | Low |
| Johnson et al.          | Low          | Low | Moderate | Low | Low | Moderate | Low |
| Massoulard et al.       | Low          | Low | Moderate | Low | Low | Moderate | Low |
| Nowson et al.           | Low          | Low | Moderate | Low | Low | Moderate | Low |
| Sherwin et al.          | Low          | Low | Moderate | Low | Low | Low      | Low |
| Wright et al.           | Low          | Low | Low      | Low | Low | Low      | Low |

|     |          |         |          |
|-----|----------|---------|----------|
| Low | Moderate | Serious | Critical |
|-----|----------|---------|----------|

(C) Confounding bias

(S) Selection bias

(ME) Measurement of Exposure

(DE) Departures from exposure

(MI) Missing data

(MO) Measurement of Outcomes

(R) Reported results

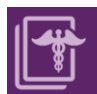**Table S4.** Outcome data for studies assessing nutrition intake, nutrition adequacy, nutrient content of the meals, and meal consumption.

| Outcomes                 | Study                             | Nutrition Intake                                                                                                                                                                   |                                   |                    |         | Dietary Adequacy      |             | Nutrition content     |                     |         |
|--------------------------|-----------------------------------|------------------------------------------------------------------------------------------------------------------------------------------------------------------------------------|-----------------------------------|--------------------|---------|-----------------------|-------------|-----------------------|---------------------|---------|
|                          |                                   | Intervention<br>TMDs                                                                                                                                                               | Control<br>TMDs                   | Std                | P value | Intervention/<br>TMDs | Control/Std | Intervention/<br>TMDs | Control<br>TMDs/Std | P value |
| Meal<br>consumption<br>% | Cassen et al.                     | 15% increase                                                                                                                                                                       |                                   |                    |         |                       |             |                       |                     |         |
|                          | de Sa et al. (meal)               |                                                                                                                                                                                    | B: 75.3<br>S: 74.2                | 79.7               |         |                       |             |                       |                     |         |
|                          | (meal + ONS)                      |                                                                                                                                                                                    | B: 78.0<br>S: 68.9                | 74.2               |         |                       |             |                       |                     |         |
|                          | ONS (morning vs<br>afternoon tea) |                                                                                                                                                                                    | B: 82.6 vs 100<br>S: 84.7 vs 96.8 | 81.9<br>vs<br>58.3 |         |                       |             |                       |                     |         |
|                          | Farrer et al.                     | ↑ %participants consuming from < 25% to >75% in 2-week of moulded puree $p = 0.03$<br>NS ↓ in plate wastage with moulded compared to non-moulded puree (160g vs 286g, $p = 0.09$ ) |                                   |                    |         |                       |             |                       |                     |         |
|                          | Higashiguchi                      | Enzyme-infused TMDs showed a slightly ↑ consumption compared to unmodified TMDs (69.6% vs 68.7%, $p > 0.05$ )                                                                      |                                   |                    |         |                       |             |                       |                     |         |
|                          | Keller et al.                     | NS ↑ by using mix of cMTF and rMTF compared to cMTF ( $p = 0.1$ )                                                                                                                  |                                   |                    |         |                       |             |                       |                     |         |
|                          | Kennewell and<br>Kokkinakos       | NS ↑ with infant cereal fortified puree                                                                                                                                            |                                   |                    |         |                       |             |                       |                     |         |
|                          | Miles et al.                      |                                                                                                                                                                                    | P: 59%<br>MM: 55%<br>S: 52%       | 43%                |         |                       |             |                       |                     |         |
|                          | Torrence                          | Significant ↑ consumption of breakfast ( $p=0.007$ ), dinner ( $p=0.017$ ) and dessert ( $p=0.005$ ) with pre-shaped puree                                                         |                                   |                    |         |                       |             |                       |                     |         |
|                          | Wright et al.                     |                                                                                                                                                                                    | 13% (n=4)                         |                    |         |                       |             |                       |                     |         |

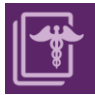

|                   |                           |                                                                                                                                      |                                  |                |      |                                                                        |                    |            |         |  |
|-------------------|---------------------------|--------------------------------------------------------------------------------------------------------------------------------------|----------------------------------|----------------|------|------------------------------------------------------------------------|--------------------|------------|---------|--|
|                   | Zanini et al.             | 83.4% and 12.3% of the texture-individualised TMDs were fully or partially consumed respectively<br>4.1% of the meals were not eaten |                                  |                |      |                                                                        |                    |            |         |  |
| % of Energy eaten | Nowson et al.             |                                                                                                                                      | S: 76.7 (24.5)<br>P: 74.1 (19.8) | 82.2<br>(16.9) |      |                                                                        |                    |            |         |  |
| Energy (kcal/d)   | Bannerman and McDermott   |                                                                                                                                      | 1312 (326)                       | 1569 (260)     | 0.02 | Both were sig. less than DRI, $p < 0.001$                              |                    |            |         |  |
|                   | Beck and Hansen``         |                                                                                                                                      |                                  |                |      | Chopped diet menu below<br>DRI of 2100 kcal/d, NS                      | C: 2050<br>B: 2170 | 2400       |         |  |
|                   | Cassen et al.             | 41% increased intake                                                                                                                 |                                  |                |      |                                                                        |                    |            |         |  |
|                   | Dahl et al.               |                                                                                                                                      | 1074 (202)                       |                |      |                                                                        |                    |            |         |  |
|                   | Durant                    |                                                                                                                                      |                                  |                |      |                                                                        | 1666 (78)          | 2120 (222) | < 0.001 |  |
|                   | Foley et al.<br>kcal/kg/d | Day 1                                                                                                                                | 19.2 (5.1)                       | 20.0 (5.4)     | NS   | 79.6 (18.6) %                                                          | 81.9 (20.0) %      |            |         |  |
|                   |                           | Day 7                                                                                                                                | 18.1 (6.2)                       | 19.4 (5.9)     | NS   | 75.7 (24.1) %                                                          | 77.0 (17.8) %      |            |         |  |
|                   |                           | Day 11                                                                                                                               | 20.6 (6.0)                       | 20.5 (5.0)     | NS   | 86.1 (27.0) %                                                          | 79.0 (20.9) %      |            |         |  |
|                   |                           | Day 14                                                                                                                               | 22.0 (5.0)                       | 21.3 (6.2)     | NS   | 94.0 (18.0) %                                                          | 81.3 (18.2) %      |            |         |  |
|                   |                           | Day 21                                                                                                                               | 19.4 (6.2)                       | 22.3 (9.0)     | NS   | 84.1 (23.4) %                                                          | 84.1 (28.6) %      |            |         |  |
|                   | Germain et al.            | 1947 (317)                                                                                                                           | 1603 (366)                       |                | 0.08 | Both pre-/post intervention had <b>inadequate</b> intake (2000 kcal/d) |                    |            |         |  |

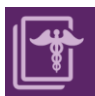

|  |                                 |              |                                        |                |        |                                                                                                  |  |  |            |            |  |
|--|---------------------------------|--------------|----------------------------------------|----------------|--------|--------------------------------------------------------------------------------------------------|--|--|------------|------------|--|
|  | Higashiguchi                    | 1097.2 (395) | 1036.4 (349.3)                         |                | <0.05  | Both pre-/post intervention had <b>inadequate</b> intake (1200-1500 kcal/d)                      |  |  | 1365       |            |  |
|  | Johnson et al.                  |              | 1291 (140)                             | 1380 (207)     | 0.100  | Both diets had <b>inadequate</b> intake (1900 kcal/d)                                            |  |  | 1786       | 2153       |  |
|  | Keller et al. (per plate)       | 142.7 (35.3) | 143.1 (35.3)                           |                | 1.0    |                                                                                                  |  |  |            |            |  |
|  | Massoulard et al.               |              | C: 1764.3 (283.2)<br>M: 1499.2 (308.8) | 1627.0 (447.1) |        | All diets had <b>inadequate</b> intake (30-40 kcal/kg/d)                                         |  |  |            |            |  |
|  | McCormick et al. ``             |              | 582 (241)                              | 267 (50)       | 0.0001 |                                                                                                  |  |  |            |            |  |
|  | Nowson et al.                   |              | S: 932.1 (501.9)<br>P: 908.2 (167.3)   | 1123.3 (454.1) | <0.001 |                                                                                                  |  |  |            |            |  |
|  | Ott et al.                      | 1611.1       | 1417.7                                 |                | <0.05  | Adequate (1630 kcal/d) intake after shaped and fortified.<br>Inadequate intake pre-intervention. |  |  |            |            |  |
|  | Philip et al.                   | 1534 (310)   | 1305 (282)                             |                |        | Both groups had appropriate intake (1029-1326 kcal/d)                                            |  |  | 2462 (310) | 2057 (294) |  |
|  | Reyes-Torres et al. (kcal/kg/d) | 40 (15)      | 34 (10)                                |                | 0.11   |                                                                                                  |  |  |            |            |  |
|  | Sherwin et al.                  |              | S: 908.2 (47.8)<br>H: 1027.7 (47.8)    | 1338.4 (47.8)  | <0.05  |                                                                                                  |  |  |            |            |  |



|               |                                           |                      |                |             |         |                                                                                                                                                                       |                  |                       |                           |                |       |
|---------------|-------------------------------------------|----------------------|----------------|-------------|---------|-----------------------------------------------------------------------------------------------------------------------------------------------------------------------|------------------|-----------------------|---------------------------|----------------|-------|
|               | Taylor and Barr                           | 1342 (177)           | 1325 (207)     |             | 0.565   |                                                                                                                                                                       |                  |                       | 1651 (177)                | 1661 (185)     | NS    |
|               | Vucea et al.                              |                      |                |             |         |                                                                                                                                                                       |                  |                       | 1800.9 (507.2)            | 2058.4 (397.1) | NS    |
|               | Welch et al.                              | 2460.5 (93.1)        | 1662.5 (121.6) |             | <0.001  | Adequate (1900kcal/d) with fortified cereal and ONS<br>Inadequate intake pre-intervention                                                                             |                  |                       |                           |                |       |
|               | Wright et al.<br>% of requirements meet   |                      | 927 (339)      | 1462 (615)  | <0.0001 | -609 (255)<br>60%                                                                                                                                                     | -85 (565)<br>95% | <<br>0<br>0<br>0<br>1 |                           |                |       |
|               | Zanini                                    |                      |                |             |         |                                                                                                                                                                       |                  |                       | 1850                      |                |       |
| Protein (g/d) | Bannerman and McDermott                   |                      | 44.4 (12.4)    | 49.6 (10.4) | 0.23    | Both met the DRV                                                                                                                                                      |                  |                       |                           |                |       |
|               | Beck and Hansen ``<br>% of energy content |                      |                |             |         | All below DRV of 18% E (90g),<br>p<.001                                                                                                                               |                  |                       | C: 12<br>B: 11            | 13%            |       |
|               | Cassen et al.                             | 36% increased intake |                |             |         |                                                                                                                                                                       |                  |                       |                           |                |       |
|               | Dahl et al.                               |                      | 54 (19)        |             |         | 43% and 87% of pureed diets from 2 provinces were able to provide 59g/d (moderate risk of inadequacy); 0% and 40% were able to provide 78g/d (low risk of inadequacy) |                  |                       | 57.9 (7.9)<br>85.4 (31.1) |                |       |
|               | Durant                                    |                      |                |             |         |                                                                                                                                                                       |                  |                       | 67 (2)                    | 74 (7)         | <.001 |



|  |                           |        |             |                                  |             |       |                                                                                           |             |             |  |
|--|---------------------------|--------|-------------|----------------------------------|-------------|-------|-------------------------------------------------------------------------------------------|-------------|-------------|--|
|  | Foley et al. g/kg/d       | Day 1  |             | 0.69 (0.17)                      | 0.84 (0.28) | NS    | Both diets had inadequate intake (1.0 g/kg/d)                                             |             |             |  |
|  |                           | Day 7  |             | 0.67 (0.28)                      | 0.85 (0.27) | NS    |                                                                                           |             |             |  |
|  |                           | Day 11 |             | 0.76 (0.26)                      | 0.87 (0.22) | NS    |                                                                                           |             |             |  |
|  |                           | Day 14 |             | 0.89 (0.19)                      | 0.80 (0.23) | NS    |                                                                                           |             |             |  |
|  |                           | Day 21 |             | 0.71 (0.29)                      | 0.90 (0.31) | NS    |                                                                                           |             |             |  |
|  | Germain et al.            |        | 83.1 (21.2) | 56.6 (19.8)                      |             | .03   | Met lower limit (1.0-1.3 g/kg/d) pre-intervention                                         |             |             |  |
|  | Higashiguchi              |        | 49.9 (18.1) | 40.0 (14.1)                      |             | <.01  |                                                                                           | 64.1        |             |  |
|  | Johnson et al.            |        |             | 56.0 (7.0)                       | 56.0 (11.0) | 0.849 | Both diets had adequate intake (46.0 g/d)                                                 | 78.0        | 88.0        |  |
|  | Keller et al. (per plate) |        | 10.6 (5.0)  | 9.7 (5.0)                        |             | 0.4   |                                                                                           |             |             |  |
|  | Massoulard et al.         |        |             | C: 69.7 (10.2)<br>M: 68.0 (15.7) | 62.4 (16.8) |       | Lower limit DRI (1.0g/kg/d)                                                               |             |             |  |
|  | McCormick et al. ``       |        |             | 15 (7)                           | 7 (3)       | 0.001 |                                                                                           |             |             |  |
|  | Nowson et al.             |        |             | S: 46.8 (18.8)<br>P: 41.7 (15.2) | 48.9 (18.0) | NS    |                                                                                           |             |             |  |
|  | Ott et al.                |        | 69.0        | 40.4                             |             | <0.01 | Adequate (60 g/d) intake after shaped and fortified<br>Inadequate intake pre-intervention |             |             |  |
|  | Philip et al. (g/kg/d)    |        | 1.04 (0.29) | 1.00 (0.30)                      |             |       | ↓ risk of inadequate intake (0.8 g/kg/d) was in fortified TMDs (8% vs 16%)                | 1.93 (0.37) | 1.54 (0.39) |  |





|                     |                                         |              |                                |                     |         |                                                        |               |              |                    |               |       |
|---------------------|-----------------------------------------|--------------|--------------------------------|---------------------|---------|--------------------------------------------------------|---------------|--------------|--------------------|---------------|-------|
|                     | Reyes-Torres et al.(g/kg/d)             | 1.8 (0.7)    | 1.4 (0.5)                      |                     | 0.35    |                                                        |               |              | 19 (5)% E          | 17 (5)%E      |       |
|                     | Sherwin et al.                          |              | S: 49.8 (3.1)<br>H: 39.5 (1.9) | 62.2 (2.9)          | <0.05   |                                                        |               |              |                    |               |       |
|                     | Vucea et al.                            |              |                                |                     |         | Both diets provided adequate DRV (56 g/d)              |               |              | 82.2 (23.6)        | 86.5 (20.7)   | NS    |
|                     | Welch et al. (g/kg/d)                   | 2.33 (0.09)  | 1.58 (0.11)                    |                     | <0.0001 | Both diets met DRV (0.8g/kg/d)                         |               |              |                    |               |       |
|                     | Wright et al.<br>% of requirements meet |              | 40 (18.6)                      | 60 (27)             | 0.003   | -22 (16.9) 55%                                         | -6 (24.8) 91% | .0<br>1<br>3 |                    |               |       |
|                     | Zanini                                  |              |                                |                     |         |                                                        |               |              | 65.81<br>13.08 % E |               |       |
| NSP (g/d)           | Bannerman and McDermott                 |              | 6.3 (1.7) ~ 35% DRV            | 8.3 (2.7) ~ 46% DRV | 0.03    | Both were sig. less than DRI (19g/d), <b>p&lt;.001</b> |               |              |                    |               |       |
| Carbohydrates (g/d) | Durant                                  |              |                                |                     |         |                                                        |               |              | 255 (6)            | 320 (38)      | <.001 |
|                     | Germain et al.                          | 272 (44.5)   | 254 (66.8)                     |                     | 0.55    |                                                        |               |              |                    |               |       |
|                     | Higashiguchi                            | 166.7 (61.6) | 161.4 (54.9)                   |                     | >0.05   |                                                        |               |              | 207                |               |       |
|                     | Keller et al. (per plate)               | 14.6 (4.9)   | 15.8 (4.9)                     |                     | 0.3     |                                                        |               |              |                    |               |       |
|                     | Massoulard et al. %E                    |              | C: 48.0 (5.5)<br>M: 46.7 (5.2) | 45.5 (7.2)          |         |                                                        |               |              |                    |               |       |
|                     | Reyes-Torres et al. %E                  |              |                                |                     |         |                                                        |               |              | 56 (11) %E         | 55 (12)%<br>E |       |



|             |                                           |             |                                |                |                              |                                                       |                    |                 |       |
|-------------|-------------------------------------------|-------------|--------------------------------|----------------|------------------------------|-------------------------------------------------------|--------------------|-----------------|-------|
|             | Vucea et al.                              |             |                                |                |                              | Both diets provided adequate<br>DRI (130 g/d)         | 229.2<br>(66.9)    | 265.8<br>(52.2) | NS    |
|             | Zanini                                    |             |                                |                |                              |                                                       | 259.04<br>56.01% E |                 |       |
| Fibre (g/d) | Germain et al.                            | 12.2 (4.01) | 16.2 (4.57)                    |                | 0.1                          |                                                       |                    |                 |       |
|             | Keller et al. (per plate)                 | 1.8 (0.9)   | 1.9 (0.9)                      |                | 0.6                          |                                                       |                    |                 |       |
|             | Nowson et al.                             |             | S: 15.3 (6.5)<br>P: 14.6 (4.9) | 19.2<br>(10.4) | <0.01<br>between<br>P & Std. | Insufficient, 73% consumed <20g/d                     |                    |                 |       |
|             | Sherwin et al.                            |             | S: 14.0 (1.2)<br>P: 16.5 (0.9) | 20.8<br>(1.5)  | <0.05<br>between<br>S & Std. |                                                       |                    |                 |       |
|             | Vucea et al.                              |             |                                |                |                              | Both diets provided<br><b>inadequate</b> DRI (30 g/d) | 16.9 (5.68)        | 20.9<br>(5.05)  | NS    |
|             | Welch et al.                              | 12.0        |                                |                |                              |                                                       |                    |                 |       |
| Fat (g/d)   | Beck and Hansen ``<br>% of energy content |             |                                |                |                              | All below DRI of 50% E,<br><b>p&lt;.001</b>           | C: 38<br>B: 37     | 40%             |       |
|             | Durant                                    |             |                                |                |                              |                                                       | 43 (7)             | 63 (9)          | <.001 |
|             | Germain et al.                            | 62.3 (11.2) | 43.3 (11.1)                    |                | <0.01                        |                                                       |                    |                 |       |
|             | Higashiguchi                              | 25.2 (9.8)  | 25.3 (10.8)                    |                | >0.05                        |                                                       | 29.7               |                 |       |
|             | Keller et al. (per plate)                 | 5.5 (1.3)   | 4.6 (1.3)                      |                | 0.0                          |                                                       |                    |                 |       |
|             | Massoulard et al. %E                      |             | C: 33.8 (6.1)<br>M: 34.3 (5.4) | 37.8<br>(6.9)  | <0.05                        |                                                       |                    |                 |       |
|             | Reyes-Torres et al. %E                    |             |                                |                |                              |                                                       | 26 (9) %E          | 28 (9)<br>%E    |       |



|              |                         |                  |                                        |                                      |           |                                                                                                                    |                                                      |                                                       |            |    |
|--------------|-------------------------|------------------|----------------------------------------|--------------------------------------|-----------|--------------------------------------------------------------------------------------------------------------------|------------------------------------------------------|-------------------------------------------------------|------------|----|
|              | Zanini                  |                  |                                        |                                      |           |                                                                                                                    | 63.55<br>30.91 %E                                    |                                                       |            |    |
| Fluid (ml/d) | Bannerman and McDermott |                  | 1196 (288) ~ 75% estimated requirement | 1611 (362)                           | 0.002     | TMDs were sig. <b>less</b> than EAR, <b>p&lt;.001</b> ; 33.3% (n=5) on Std, and 6.7% (n=1) on TMD met requirements |                                                      |                                                       |            |    |
|              | Philip et al.           | 301 (103)        | 301 (103)                              |                                      |           | 100% risk of <b>inadequate</b> intake (1500ml/d) in both groups                                                    |                                                      |                                                       | 594 (209)  |    |
|              | Taylor and Barr         | 698 (156)        | 612 (176)                              |                                      | 0.003     |                                                                                                                    |                                                      | 1148 (177)                                            | 1116 (387) | NS |
|              | Finestone et al.        |                  | Dysphagia diet + TF                    | Enteral feed → Dysphagia diet + TF   |           | Dysphagia diet+TF                                                                                                  | Enteral feed → Dysphagia diet + TF                   |                                                       |            |    |
|              |                         |                  |                                        | 755 (162)                            | 984 (486) |                                                                                                                    | Met 33 (5) % of fluid requirements (2278 (331) ml/d) | Met 43 (20) % of fluid requirements (2294 (276) ml/d) |            |    |
|              | Garon et al.            | TF+ water        | TF only                                |                                      |           |                                                                                                                    |                                                      |                                                       |            |    |
|              |                         | 1318 (855 + 463) | 1210                                   | p = 0.03 on TF, NS on overall intake |           |                                                                                                                    |                                                      |                                                       |            |    |



|          |                                         |                                |                      |                                        |                    |             |                                                                   |       |             |                   |                   |    |
|----------|-----------------------------------------|--------------------------------|----------------------|----------------------------------------|--------------------|-------------|-------------------------------------------------------------------|-------|-------------|-------------------|-------------------|----|
|          | Karagian<br>nis et al.                  | Interven<br>tion vs<br>control | 1767 (10.7)          | 1378 (33.7)                            |                    | <0.001      |                                                                   |       |             |                   |                   |    |
|          |                                         | post- vs<br>pre-               | 1767 (10.7)          | 1428 (7.0)                             |                    | ≤0.001      |                                                                   |       |             |                   |                   |    |
|          |                                         |                                |                      | <b>TMD +TF<br/>+External<br/>fluid</b> | <b>TMD<br/>+TF</b> |             |                                                                   |       |             |                   |                   |    |
|          | Vivanti et al.                          |                                |                      | 2165 (867)                             | 1174<br>(455)      | <0.001      | <b>Inadequate</b> by TMD+TF only                                  |       |             |                   |                   |    |
|          |                                         |                                | <b>Pre-thickened</b> | <b>Powder-<br/>thickened</b>           |                    |             |                                                                   |       |             |                   |                   |    |
|          | McCormick et al. ``                     |                                | 795 (346)            | 785 (202)                              |                    | 0.47        |                                                                   |       |             |                   |                   |    |
|          | Whelan<br>et al.                        |                                | 554 (173)            | 278 (233)                              |                    | <b>0.04</b> | Mean daily intake was 455 ml/d, only meet 22% of the requirements |       |             |                   |                   |    |
|          |                                         |                                | 547 (391)            | 490 (484)                              |                    | NS          |                                                                   |       |             |                   |                   |    |
| Na (mg)  | de Sa et al. % of<br>inadequacy * (>UL) |                                |                      |                                        |                    |             | S: 80.0<br>B: 85.2                                                | 76.2  | .0<br>09    |                   |                   |    |
|          | Germain et al.                          |                                | 3270 (915)           | 2781 (297)                             |                    | 0.32        |                                                                   |       |             |                   |                   |    |
|          | Higashiguchi                            |                                | 2302.4 (873.9)       | 2261.8 (989.5)                         |                    | >0.05       |                                                                   |       |             |                   |                   |    |
|          | Keller et al. (per plate)               |                                | 323.8 (114.5)        | 257.2 (114.5)                          |                    | 0.2         |                                                                   |       |             | 2042              |                   |    |
|          | Vucea et al.                            |                                |                      |                                        |                    |             | Both diets provided adequate<br>DRI (2300 mg/d)                   |       |             | 2775.9<br>(920.3) | 3140.7<br>(830.2) | NS |
| K (mg/d) | de Sa et al. % of<br>inadequacy         |                                |                      |                                        |                    |             | S: 100.0<br>B: 100.0                                              | 100.0 | N<br>/<br>A |                   |                   |    |



|           |                                     |             |             |            |         |                                                       |          |       |                    |                |      |
|-----------|-------------------------------------|-------------|-------------|------------|---------|-------------------------------------------------------|----------|-------|--------------------|----------------|------|
|           | Germain et al.                      | 3913 (665)  | 309 (689)   |            | 0.04    |                                                       |          |       |                    |                |      |
|           | Johnson et al.                      |             | 2148 (322)  | 2116 (492) | 0.798   | Both diets met the DRI (2000mg/d)                     |          |       | 2988               | 3064           |      |
|           | Vucea et al.                        |             |             |            |         | Both diets provided <b>inadequate</b> DRI (4700 mg/d) |          |       | 3111.3 (1035.6)    | 3103.2 (768.3) | NS   |
| Fe (mg/d) | de Sa et al. % of inadequacy        |             |             |            |         | S: 0.0<br>B: 40.7                                     | 19.8     | 0.027 |                    |                |      |
|           | Germain et al.                      | 15.6 (4.34) | 13.9 (3.95) |            | 0.45    |                                                       |          |       |                    |                |      |
|           | Johnson et al.                      |             | 8.0 (1.0)   | 10.0 (3.0) | 0.002   | TMD had <b>inadequate</b> intake (10.0 mg/d)          |          |       | 10.3               | 14.8           |      |
|           | Kennewell and Kikkinakos (per meal) |             |             |            |         | Increased 57% iron content                            |          |       | P:4.22<br>MM: 4.11 | 2.69<br>2.62   |      |
|           | Moreira et al. **                   |             |             |            |         | All diets contained <b>insufficient</b> DRI (18 mg/d) |          |       | S:16.9<br>B:9.3    | 13.0           | <.05 |
|           | Philip et al.                       | 34.0 (7.0)  | 16.0 (3.0)  |            |         | Appropriate intake (10 mg/d) in both groups           |          |       | 54 (11)            | 20 (4)         |      |
|           | Vucea et al.                        |             |             |            |         | Both diets provided adequate DRI (9 mg/d)             |          |       | 11.3 (3.17)        | 13.6 (3.32)    | <.01 |
|           | Welch et al.                        | 22.9 (1.14) | 18.1 (1.29) |            | <0.0007 | Adequate (10 mg/d)                                    | Adequate |       |                    |                |      |
|           |                                     |             |             |            |         | S: 20.0<br>B: 48.2                                    | 69.0     | <.001 |                    |                |      |
| Zn (mg/d) | de Sa et al. % of inadequacy        |             |             |            |         |                                                       |          |       |                    |                |      |
|           | Germain et al.                      | 14.6 (4.42) | 7.69 (3.44) |            | <0.01   |                                                       |          |       |                    |                |      |



|           |                                 |            |                                         |                      |         |                                                                              |            |                   |                   |      |
|-----------|---------------------------------|------------|-----------------------------------------|----------------------|---------|------------------------------------------------------------------------------|------------|-------------------|-------------------|------|
|           | Johnson et al.                  |            | 6.1 (1.3)                               | 6.8<br>(2.0)         | 0.174   | Both diets did not meet the<br>DRI (12.0mg/d)                                |            | 8.6               | 9.7               |      |
|           | Moreira et al. **               |            |                                         |                      |         | Both standard and blend<br>contained insufficient Zn<br>content (11 mg/d)    |            | S:21.0<br>B:10.48 | 8.5               | <.05 |
|           | Vucea et al.                    |            |                                         |                      |         | Both diets provided<br><b>inadequate</b> DRI (11 mg/d)                       |            | 9.31 (3.88)       | 10.6<br>(3.22)    | <.01 |
|           | Welch et al.                    | 18.1 (0.7) | 10.0 (0.6)                              |                      | <0.0001 | Adequate (12<br>mg/d)                                                        | Inadequate |                   |                   |      |
| Ca (mg/d) | de Sa et al. % of<br>inadequacy |            |                                         |                      |         | S: 40.0<br>B: 88.9                                                           | 76.2       | .006              |                   |      |
|           | Germain et al.                  | 1347 (644) | 865 (257)                               |                      | 0.1     |                                                                              |            |                   |                   |      |
|           | Johnson et al.                  |            | 667 (170)                               | 660<br>(243)         | 0.916   | Both diets did not meet the<br>DRI (800mg/d)                                 |            | 1241              | 1342              |      |
|           | McCormick et al. ``             |            | 544 (156)                               | 25 (8)               | 0.0001  |                                                                              |            |                   |                   |      |
|           | Nowson et al.                   |            | S: 366.1 (180.6)<br>P: 356.8<br>(155.8) | 437.9<br>(127.2<br>) | NS      | All diets had inadequate intake, 94% consumed <75% RDI                       |            |                   |                   |      |
|           | Philip et al.                   | 1310 (332) | 507 (120)                               |                      |         | ↓ prevalence of inadequate intake (800 mg/d) in fortified<br>TMDs (9 vs 95%) |            |                   |                   |      |
|           | Sherwin et al.                  |            | S: 405 (50)<br>H:513 (41)               | 544<br>(27)          | NS      |                                                                              |            |                   |                   |      |
|           | Vucea et al.                    |            |                                         |                      |         | Both diets provided<br><b>inadequate</b> DRI (1200 mg/d)                     |            | 1031.4<br>(459.4) | 1016.3<br>(373.8) | NS   |

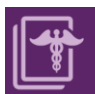

|           |                                 |              |              |  |         |                                                           |                 |    |                   |                 |      |
|-----------|---------------------------------|--------------|--------------|--|---------|-----------------------------------------------------------|-----------------|----|-------------------|-----------------|------|
|           | Welch et al.                    | 2272 (51.2)  | 888.8 (71.2) |  | <0.001  | Both diets met DRV<br>(800mg/d)                           |                 |    |                   |                 |      |
| Mg (mg/d) | de Sa et al. % of<br>inadequacy |              |              |  |         | S: 90.0<br>B: 85.2                                        | 59.5<br>64      | .0 |                   |                 |      |
|           | Germain et al.                  | 366 (92.2)   | 253 (74.1)   |  | 0.02    |                                                           |                 |    |                   |                 |      |
|           | Vucea et al.                    |              |              |  |         | Both diets provided<br><b>inadequate</b> DRI (420 mg/d)   |                 |    | 265.4<br>(94.7)   | 315.1<br>(74.6) | <.01 |
|           | Welch et al.                    | 521.3 (12.9) | 208.8 (13.2) |  | <0.0001 | Adequate<br>(280/350 mg/d)                                | Inadequate      |    |                   |                 |      |
| Cu (mg/d) | de Sa et al. % of<br>inadequacy |              |              |  |         | S: 70.0<br>B: 40.7                                        | 42.1<br>56<br>3 | 0. |                   |                 |      |
|           | Moreira et al. **               |              |              |  |         | Soft diet contained insufficient<br>Cu content (0.9 mg/d) |                 |    | S:0.71<br>B: 1.00 | 0.97            | <.05 |
|           | Vucea et al.                    |              |              |  |         | Both diets provided adequate<br>DRI (0.9 mg/d)            |                 |    | 1.08 (0.55)       | 1.41<br>(0.88)  | NS   |
| Mn (mg/d) | de Sa et al. % of<br>inadequacy |              |              |  |         | S: 80.0<br>B: 37.0                                        | 24.6<br>04      | .0 |                   |                 |      |
|           | Moreira et al. **               |              |              |  |         | Soft diet contained insufficient<br>Mn content (2.3 mg/d) |                 |    | S:1.72<br>B: 3.09 | 3.34            | NS   |
|           | Vucea et al.                    |              |              |  |         | Both diets provided adequate<br>DRI (2.3 mg/d)            |                 |    | 2.98 (1.38)       | 4.32<br>(1.38)  | NS   |
| P (mg/d)  | de Sa et al. % of<br>inadequacy |              |              |  |         | S: 10.0<br>B: 11.1                                        | 17.5<br>40<br>9 | 0. |                   |                 |      |



|                       |                                 |               |               |                |         |                                                    |             |               |                   |                   |    |
|-----------------------|---------------------------------|---------------|---------------|----------------|---------|----------------------------------------------------|-------------|---------------|-------------------|-------------------|----|
|                       | Vucea et al.                    |               |               |                |         | Both diets provided adequate<br>DRI (700 mg/d)     |             |               | 1355.8<br>(440.1) | 1465.9<br>(362.3) | NS |
|                       | Welch et al.                    | 2520 (64.8)   | 1307.2 (84.8) |                | <0.0001 | Both diets met DRV (800 mg/d)                      |             |               |                   |                   |    |
| Se (ug/d)             | de Sa et al. % of<br>inadequacy |               |               |                |         | S: 10.0<br>B: 33.3                                 | 22.2        | 0.<br>52<br>4 |                   |                   |    |
|                       | Moreira et al. **               |               |               |                |         | Blend diet provided<br>inadequate DRI (55 ug/d)    |             |               | S:0.06<br>B: 0.05 | 0.07              | NS |
|                       | Vucea et al.                    |               |               |                |         | Both diets provided adequate<br>DRI (55 ug/d)      |             |               | 0.874<br>(0.445)  | 1.163<br>(0.352)  | NS |
| Vitamin A<br>(ugRE/d) | Philip et al.                   | 1705 (31)     |               |                |         | Appropriate intake (800/1000 RAE/d) in both groups |             |               |                   |                   |    |
|                       | Vucea et al.                    |               |               |                |         | Both diets provided adequate<br>DRI (900 RAE /d)   |             |               | 982.4<br>(503.9)  | 1061.8<br>(618.0) | NS |
|                       | Welch et al.                    | 2133.9 (72.9) | 891.9 (72.9)  |                | <0.0001 | Both diets met DRV (800/1000 RAE/d)                |             |               |                   |                   |    |
| Vitamin C<br>(mg/d)   | Adolphe et al.                  | 228 (67)      | 151 (78)      |                | 0.007   | All met DRI<br>(90 mg/d)                           | 90% met DRI |               |                   |                   |    |
|                       | Germain et al.                  | 175.0 (44.4)  | 182.0 (76.1)  |                | 0.82    |                                                    |             |               |                   |                   |    |
|                       | Johnson et al.                  |               | 104.0 (18.0)  | 89.0<br>(29.0) | 0.027   | Both diets met the DRI (60<br>mg/d)                |             |               | 113.0             | 124.0             |    |
|                       | McCormick et al. ``             |               | 170 (134)     | 35<br>(48)     | 0.001   |                                                    |             |               |                   |                   |    |
|                       | Philip et al.                   | 117 (39)      |               |                |         | Appropriate intake (60mg/d) in<br>both groups      |             |               | 184 (38)          | 184 (38)          |    |
|                       | Vucea et al.                    |               |               |                |         | Both diets provided adequate<br>DRI (90 mg/d)      |             |               | 128.6<br>(69.1)   | 130.6<br>(74.0)   | NS |





|                     |                       |              |                              |               |         |                                                        |                |             |                |
|---------------------|-----------------------|--------------|------------------------------|---------------|---------|--------------------------------------------------------|----------------|-------------|----------------|
|                     | Welch et al.          | 180.2 (5.4)  | 78.6 (6.42)                  |               | <0.0001 | Both diets met DRV (60mg/d)                            |                |             |                |
| Vitamin D<br>(ug/d) | Adolphe et al.        | 12.2 (3.3)   | 2.1 (2.2)                    |               | 0.005   | 0% met DRI pre-/post-<br>fortification (15 ug/d)       |                |             |                |
|                     | Germain et al.        | 10.1 (5.35)  | 5.19 (2.01)                  |               | 0.05    |                                                        |                |             |                |
|                     | Johnson et al. (IU/d) |              | 131 (51)                     | 157<br>(77)   | 0.209   | Both diets did not meet the<br>DRI (200 IU/d)          |                | 396         | 445            |
|                     | McCormick et al. ``   |              | 5 (2)                        | 0 (0)         | 0.00001 |                                                        |                |             |                |
|                     | Nowson et al.         |              | S: 0.8 (0.5)<br>P: 1.9 (0.5) | 1.0<br>(0.8)  | NS      | Insufficient, 91% consumed <3<br>ug/d                  |                |             |                |
|                     | Vucea et al.          |              |                              |               |         | Both diets provided<br><b>inadequate</b> DRI (20 ug/d) |                | 8.42 (4.43) | 7.52<br>(3.78) |
|                     | Welch et al. (IU/d)   | 614 (14)     | 175 (20.2)                   |               | <0.0001 | Adequate<br>(200IU/d)                                  | Inadequate     |             |                |
| Vitamin E<br>(mg/d) | Johnson et al.        |              | 12.0 (2.4)                   | 13.0<br>(3.8) | 0.256   | Both diets met the DRI (8.0<br>mg/d)                   |                | 16.0        | 21.0           |
|                     | Vucea et al.          |              |                              |               |         | Both diets provided<br><b>inadequate</b> DRI (15 mg/d) |                | 5.46 (2.68) | 6.74<br>(2.40) |
|                     | Welch et al.          | 21.72 (0.65) | 4.5 (0.46)                   |               | <0.0001 | Adequate (8.0<br>mg/d)                                 | Inadequate     |             |                |
| Thiamin<br>(mg/d)   | Adolphe et al.        | 1.7 (0.3)    | 0.8 (0.3)                    |               | 0.005   | All met DRI<br>(1.2 mg/d)                              | 10% met<br>DRI |             |                |
|                     | Germain et al.        | 1.92 (0.68)  | 1.54 (0.4)                   |               | 0.2     |                                                        |                |             |                |
|                     | Johnson et al.        |              | 1.0 (0.2)                    | 1.3<br>(0.3)  | 0.007   | Both diets met the DRI (1.0<br>mg/d)                   |                | 1.4         | 1.8            |



|                      |                |              |             |              |         |                                                                                     |                |                 |                 |    |
|----------------------|----------------|--------------|-------------|--------------|---------|-------------------------------------------------------------------------------------|----------------|-----------------|-----------------|----|
|                      | Philip et al.  | 2.33 (0.63)  | 0.80 (0.20) |              |         | ↓ prevalence of inadequate intake<br>(1.0/1.2 mg/d) in fortified TMDs<br>(0 vs 57%) |                | 3.91<br>(1.10)  | 1.18<br>(0.38)  |    |
|                      | Vucea et al.   |              |             |              |         | Both diets provided adequate<br>DRI (1.2 mg/d)                                      |                | 1.38 (0.60)     | 1.67<br>(0.50)  | NS |
|                      | Welch et al.   | 2.56 (0.08)  | 1.24 (0.08) |              | <0.0001 | Both diets met DRV (1.0 mg/d)                                                       |                |                 |                 |    |
| Riboflavin<br>(mg/d) | Adolphe et al. | 2.2 (0.4)    | 1.2 (0.4)   |              | 0.005   | All met DRI<br>(1.3 mg/d)                                                           | 30% met<br>DRI |                 |                 |    |
|                      | Germain et al. | 3.00 (1.22)  | 1.78 (0.56) |              | 0.02    |                                                                                     |                |                 |                 |    |
|                      | Johnson et al. |              | 1.4 (0.2)   | 1.5<br>(0.4) | 0.083   | Both diets met the DRI<br>(1.2mg/d)                                                 |                | 2.2             | 2.6             |    |
|                      | Philip et al.  | 2.98 (0.74)  | 1.2 (0.3)   |              |         | ↓ prevalence of inadequate intake<br>(1.2/1.4 mg/d) in fortified TMDs<br>(0 vs 28%) |                | 5.00<br>(1.11)  | 1.83<br>(0.44)  |    |
|                      | Vucea et al.   |              |             |              |         | Both diets provided adequate<br>DRI (1.3 mg/d)                                      |                | 2.28 (0.94)     | 2.43<br>(1.03)  | NS |
|                      | Welch et al.   | 3.96 (0.11)  | 1.82 (0.12) |              | <0.0001 | Both diets met DRV (1.2 mg/d)                                                       |                |                 |                 |    |
| Niacin (mg/d)        | Adolphe et al. | 24.0 (6.0)   | 19.0 (5.0)  |              | 0.007   | All met DRI<br>(16 mg/d)                                                            | 70% met<br>DRI |                 |                 |    |
|                      | Germain et al. | 36.2 (10.9)  | 22.2 (8.01) |              | 0.01    |                                                                                     |                |                 |                 |    |
|                      | Philip et al.  | 27.35 (6.81) | 13.5 (3.4)  |              |         | ↓ prevalence of inadequate intake<br>(13/15 mg/d) in fortified TMDs (0<br>vs 55%)   |                | 43.67<br>(9.78) | 19.03<br>(4.52) |    |
|                      | Vucea et al.   |              |             |              |         | Both diets provided adequate<br>DRI (16 mg/d)                                       |                | 28.8(12.3)      | 34.8<br>(9.85)  | NS |



|                       |                |              |              |              |         |                                                                                             |                |                  |                  |       |
|-----------------------|----------------|--------------|--------------|--------------|---------|---------------------------------------------------------------------------------------------|----------------|------------------|------------------|-------|
|                       | Welch et al.   | 29.89 (1.08) | 21.45 (1.69) |              | <0.0001 | Both diets met DRV (13/15 mg/d)                                                             |                |                  |                  |       |
| Vitamin B6<br>(mg/d)  | Adolphe et al. | 2.7 (0.6)    | 1.6 (0.6)    |              | 0.007   | All met DRI<br>(1.7 mg/d)                                                                   | 30% met<br>DRI |                  |                  |       |
|                       | Johnson et al. |              | 1.1 (0.3)    | 1.4<br>(0.5) | 0.029   | Both diets did not meet the<br>DRI (1.6 mg/d)                                               |                | 1.2              | 1.6              |       |
|                       | Vucea et al.   |              |              |              |         | Both diets provided<br><b>inadequate</b> DRI (1.7 mg/d)                                     |                | 1.48 (0.62)      | 1.68<br>(0.52)   | NS    |
|                       | Welch et al.   | 1.70 (0.04)  | 1.34 (0.10)  |              | <0.006  | Adequate (1.6<br>mg/d)                                                                      | Inadequate     |                  |                  |       |
| Folacin (ug/d)        | Adolphe et al. | 505 (86)     | 114 (58)     |              | 0.005   | All met DRI<br>(400 ug/d)                                                                   | 0% met DRI     |                  |                  |       |
|                       | Johnson et al. |              | 166 (22)     | 189<br>(62)  | 0.069   | TMD had <b>inadequate</b> intake<br>(180 ug/d)                                              |                | 214              | 281              |       |
|                       | Philip et al.  | 160 (52)     |              |              |         | 47 (female)/97% (male) risk of<br><b>inadequate</b> intake (180/200 ug/d)<br>in both groups |                | 264 (71)         | 264 (71)         |       |
|                       | Vucea et al.   |              |              |              |         | Both diets provided<br><b>inadequate</b> DRI (400 ug/d)                                     |                | 267.8<br>(117.5) | 375.0<br>(126.1) | <0.01 |
| Vitamin B12<br>(mg/d) | Adolphe et al. | 5.1 (1.4)    | 3.4 (1.2)    |              | 0.007   | All met DRI<br>(2.4 mg/d)                                                                   | 90% met<br>DRI |                  |                  |       |
|                       | Johnson et al. |              | 3.2 (0.8)    | 3.6<br>(1.3) | 0.219   | Both diets had adequate intake<br>(2.0 mg/d)                                                |                | 5.1              | 6.2              |       |
|                       | Vucea et al.   |              |              |              |         | Both diets provided adequate<br>DRI (2.4 mcg/d)                                             |                | 5.13 (3.04)      | 5.55<br>(4.89)   | NS    |



|                       |                |             |             |  |                   |                                                       |            |             |              |                 |
|-----------------------|----------------|-------------|-------------|--|-------------------|-------------------------------------------------------|------------|-------------|--------------|-----------------|
|                       | Welch et al.   | 6.41 (0.18) | 1.78 (0.17) |  | <b>&lt;0.0001</b> | Adequate (2.0 mg/d)                                   | Inadequate |             |              |                 |
| Pantothenic Acid (mg) | Adolphe et al. | 5.7 (1.0)   | 3.1 (1.1)   |  | <b>0.005</b>      | 90% met DRI (5 mg/d)                                  | 0% met DRI |             |              |                 |
|                       | Vucea et al.   |             |             |  |                   | Both diets provided adequate DRI (5 mg/d)             |            | 10.4 (33.0) | 22.3 (49.5)  | <b>&lt;0.01</b> |
| Vitamin K (mcg)       | Vucea et al.   |             |             |  |                   | Both diets provided <b>inadequate</b> DRI (120 mcg/d) |            | 88.2 (95.3) | 1103 (101.1) | <b>&lt;0.01</b> |

Note. ` Percentage of participants completed 100% of the meal

`` Results from Beck and Hansen McCormick et al. study was expressed as Median (Interquartile Range)

\* % of inadequate intake including either lower than Estimated Average Requirements or above Upper Limits

\*\* Results from Moreira et al. study was the mean value calculated from 3 occasions

TMD – Texture modified diet; TF – Thickened fluid; S - Soft diet; B – Blend diet; P- Pureed diet; C – Chopped diet; M – Mixed diet; MM – Minced and moist; H - Homogenised; Std – Standard diet; ONS – Oral nutrition supplement; DRI – Dietary reference intake

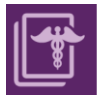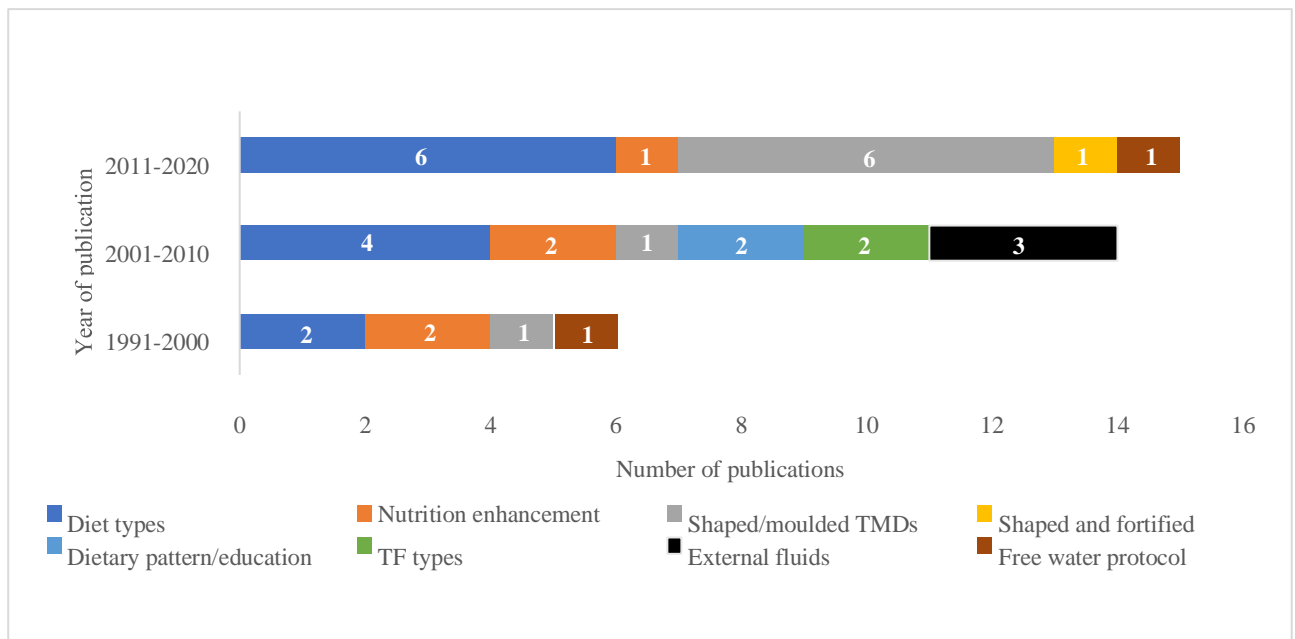

Figure S1. Eligible studies timeline.

Note. Nutrition enhancement includes oral nutrition supplements and nutrient fortification; TMDs–Texture 4 modified diets; TF–Thickened fluids; External fluids includes enteral feeds and intravenous therapy; Free water 5 protocol regarding free access of water for patients on TFs.

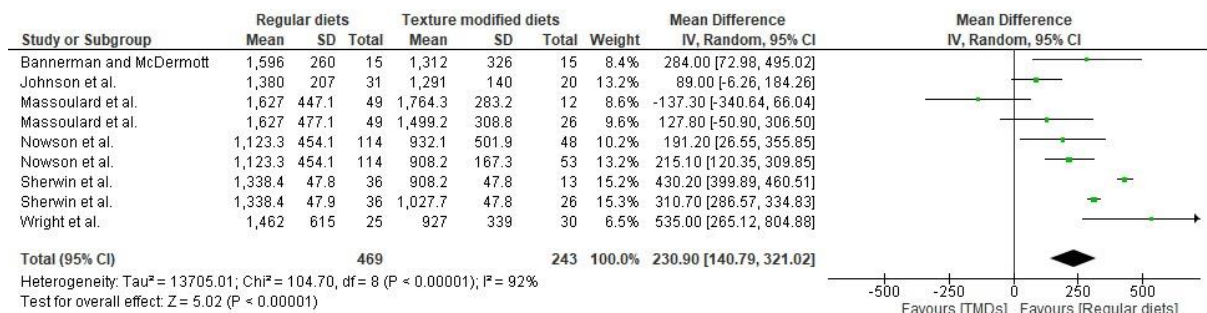

Figure S2. Forest plot of the effect of texture modified diets and regular diets on energy intake (kJ/d) among older adults.

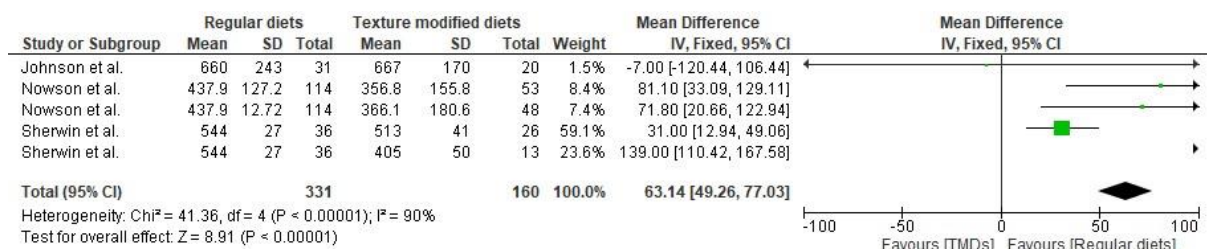

Figure S3. Forest plot of the effect of texture modified diets and regular diets on calcium intake (mg/d) among older adults.

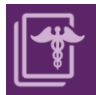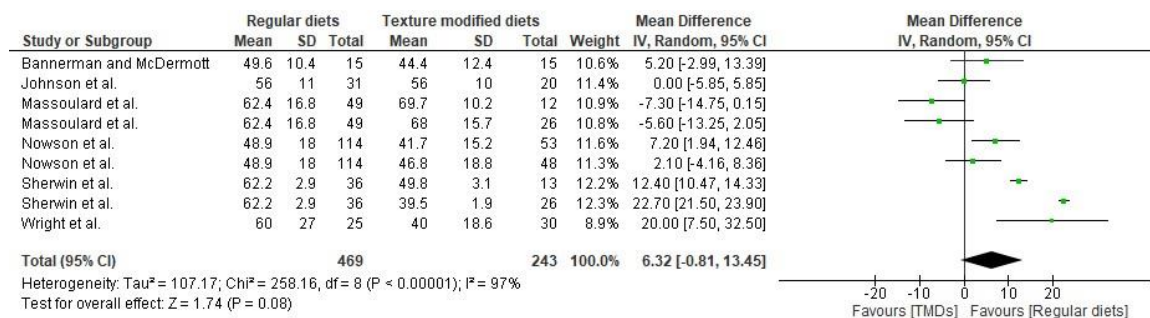

**Figure S4.** Forest plot of the effect of texture modified diets and regular diets on protein intake (g/d) among older adults.

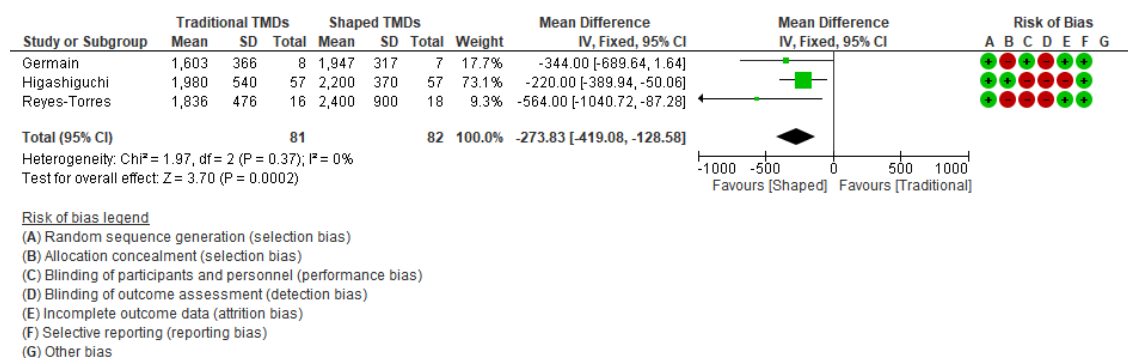

**Figure S5.** Forest plot of the effect of shaped and traditional texture modified diets on energy intake (kcal/d) among older adults.

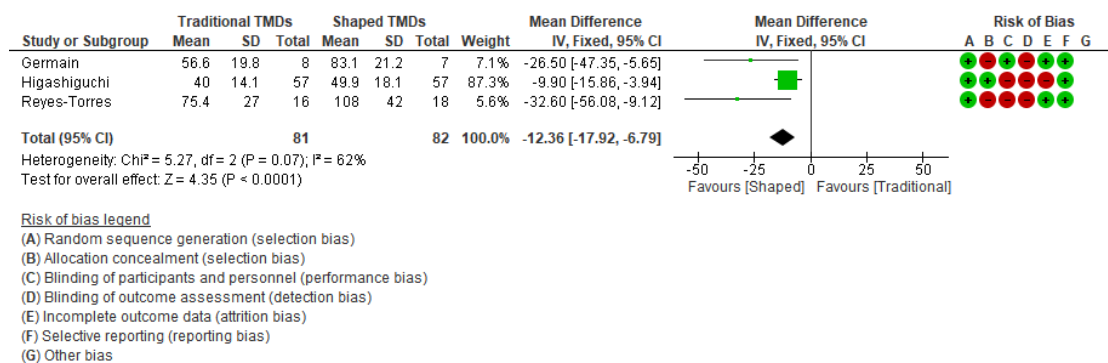

**Figure S6.** Forest Plot of the effect of shaped and traditional texture modified diets on protein intake (g/d) among older adult.
